# Supplementary material for: Mice lacking WRB reveal differential biogenesis requirements of tail-anchored proteins in vivo
Source: PubMed Central journal article supplement (PMC5175141; doi:10.1038/srep39464), 2016-12-21

## Supplementary Information

### **Mice lacking WRB reveal differential biogenesis requirements of tail-anchored proteins *in vivo***

Jhon Rivera-Monroy<sup>+</sup>, Lena Musiol<sup>+</sup>, Kirsten Unthan-Fechner, Ákos Farkas, Anne Clancy, Javier Coy-Vergara, Uri Weill, Sarah Gockel, Shuh-Yow Lin, David P Corey, Tobias Kohl, Philipp Ströbel, Maya Schuldiner, Blanche Schwappach<sup>\*</sup> and Fabio Vilardi<sup>\*</sup>

<sup>+</sup> These authors contributed equally to this work.

<sup>\*</sup> Correspondence should be addressed to  
blanche.schwappach@med.uni-goettingen.de and  
fabio.vilardi@med.uni-goettingen.de

## Materials

### Plasmids

For pGem3Z-Stx5op, the coding sequence of Stx5 was amplified from heart cDNA using primers #1 and #2. The KpnI/HindIII fragment was then cloned into pGEM3Z (Promega). pGem3Z-Stx8op was obtained similarly using primers #3 and #4

For pQE80-MBP-Stx5cyt, a KpnI/XhoI fragment was obtained using pGem3Z-Stx5op as template and primers #1 and #5. The fragment was cloned into pQE80-MBPtev<sup>1</sup>. pQE80-MBP-Stx8cyt was obtained similarly using pGem3Z-Stx8op as template and primers #3 and #6.

pCDNA5-FRT-TO-GFPStx5 was obtained by amplification of pGem3Z-Stx5op template with primers #1 and #11. The KpnI/XhoI digested fragment was cloned into pCDNA5-FRT-TO-N-GFP (Invitrogen). pCDNA5-FRT-TO-GFPStx8 was obtained similarly using pGem3Z-Stx8op as template and primers #2 and #11.

The chimeric Stx5-Stx8 constructs were obtained by fusion PCR.

For pCDNA5-FRT-TO-GFPStx5tmd8 the coding sequence of the cytosolic domain of Stx5 was amplified from pGem3Z-Stx5op using primers #1 and #7 whereas the region encoding the transmembrane segment of Stx8 was amplified from pGem3Z-Stx8op using primers #8 and #11. The PCR products were mixed in equimolar ratio and used as template for the fusion PCR using primers #1 and #11. A KpnI/XhoI fragment obtained from this final PCR was cloned into pCDNA5-FRT-TO-N-GFP.

For pCDNA5-FRT-TO-GFPStx8tmd5 the coding sequence of the cytosolic domain of Stx8 was amplified from pGem3Z-Stx8op using primers #3 and #9 whereas the region encoding the transmembrane segment of Stx8 was amplified from pGem3Z-Stx5op using primers #10 and #11. The PCR products were mixed in equimolar ratio and used as template for the fusion PCR using primers #1 and #11. A KpnI/XhoI fragment obtained from this final PCR was cloned into pCDNA5-FRT-TO-N-GFP.

### **Supplementary Reference**

1. Favalaro, V., Vilardi, F., Schlecht, R., Mayer, M. P. & Dobberstein, B. Asna1/TRC40-mediated membrane insertion of tail-anchored proteins. *J. Cell. Sci.* **123**, 1522–1530 (2010).

Supplementary Table 1: Primers

| #  | Name              | Sequence (5'-3')                                                            | Application |
|----|-------------------|-----------------------------------------------------------------------------|-------------|
| 1  | KpnI-Stx5-F       | ATACTAGGTACCATGATCCCGCGGAAACGC                                              | cloning     |
| 2  | Stx5op-HindIII-R  | TGATATAAGCTTTCAGCCCGTCTTGTGGAGAAAAGGCACGTAGAAGTTT<br>GGGCCGGCAAGGAAGACCAC   | cloning     |
| 3  | KpnI-Stx8-F       | TATACTGGTACCATGGCCCCAGACCCCTGG                                              | cloning     |
| 4  | Stx8op-HindIII-R  | TGATATAAGCTTTCAGCCCGTCTTGTGGAGAAAAGGCACGTAGAAGTTT<br>GGGCCGTTGGTTGGCCCACTGC | cloning     |
| 5  | Stx5-Nterm-XhoI-R | ATACTACTCGAGTCACCGATTGGAGGTAAC                                              | cloning     |
| 6  | Stx8-Nterm-XhoI-R | ATACTACTCGAGTCACCCACAGGAAGCTGA                                              | cloning     |
| 7  | Stx5-Stx8-R       | GCAATAAGATCACCATTATCATCCGATTGGAGGTAAGTACTGACTGG                             | cloning     |
| 8  | Stx5-Stx8-F       | CCAGTCAGTTACCTCCAATCGGATGATAATGGTGATCTTATTGC                                | cloning     |
| 9  | Stx8-Stx5-R       | GGAAGATTTTGACCATGAGCCACCCACAGGAAGCTGACTTTCTG                                | cloning     |
| 10 | Stx8-Stx5-F       | CAGAAAGTCAGCTTCTGTGGGTGGCTCATGGTCAAATCTTCC                                  | cloning     |
| 11 | opsinSTOP-XhoI-R  | TATACTACTCGAGTCAGCCCGTCTTGTGGAGAAAAGG                                       | cloning     |
| 12 | mWRB-Ex1-F        | AGCTTCGTGTTCCGGGTGTAAC                                                      | qPCR        |
| 13 | mWRB-Ex2-R        | TTGACGGTGGACAGCTCCTG                                                        | qPCR        |
| 14 | mWRB-Ex3/4-F      | CTACATACTACAAGCAGCGCTGATG                                                   | qPCR        |
| 15 | mWRB-Ex5-R        | ATCCAACAGGTGATTCCAATTCCAC                                                   | qPCR        |
| 16 | mTRC40-F          | GTCCTTGTACGAGACGGAGC                                                        | qPCR        |
| 17 | mTRC40-R          | TTGCAGGGTTTCTCAGGGTC                                                        | qPCR        |
| 18 | mCAML-F           | CTCACCACGGCCTAGAACAG                                                        | qPCR        |
| 19 | mCAML-R           | AACTCTTCCGCGGTACTTCC                                                        | qPCR        |
| 20 | mGAPDH-F          | CCAATGTGTCCGTCGTGGATCT                                                      | qPCR        |
| 21 | mGAPDH-R          | GTTGAAGTCGCAGGAGACAACC                                                      | qPCR        |
| 22 | mStx5-F           | GCGGAAACGCTACGGATCTA                                                        | qPCR        |
| 23 | mStx5-R           | GAGTGCTGTCACTGCTGCTA                                                        | qPCR        |
| 24 | mStx6-F           | TCTCACGAGTTGGAGAGCAC                                                        | qPCR        |
| 25 | mStx6-R           | AGAGGATGGCTATGGCACAC                                                        | qPCR        |
| 26 | mStx8-F           | GGAGGGGATCGAAGACAGA                                                         | qPCR        |
| 27 | mStx8-R           | GCTTCTTCGCTCATCAGGCT                                                        | qPCR        |
| 28 | mEMD-F            | GACCACCAAGACATACGGGG                                                        | qPCR        |
| 29 | mEMD-R            | AGTGTGCGATGCTCTGGTAG                                                        | qPCR        |
| 30 | mSec61 $\beta$ -F | ATGTGGCGATTCTACACGGAA                                                       | qPCR        |
| 31 | mSec61 $\beta$ -R | GCAGCATAAATACAGCAGCGA                                                       | qPCR        |
| 32 | mSTT3B-F          | CTCCAGTCCAAGTGTGGTCC                                                        | qPCR        |
| 33 | mSTT3B-R          | TGATAGCCGTAGTCCACCA                                                         | qPCR        |
| 34 | wt-Forward        | TTGGTGAGGCTTGTCTCTGGCGATTT                                                  | Genotyping  |
| 35 | wt-Reverse        | GTTGATCTTCTTTCCAGCCTGGCGTAT                                                 | Genotyping  |
| 36 | dneo-Forward      | AGTGACACGCGTACTAGTCTAGCGAA                                                  | Genotyping  |
| 37 | dneo-Reverse      | ACTCAAAGGCAACAGCCAAGATAAGCA                                                 | Genotyping  |
| 38 | oIMR3798          | AGGTGGACCTGATCATGGAG                                                        | Genotyping  |
| 39 | oIMR7338          | CTAGGCCACAGAATTGAAAGATCT                                                    | Genotyping  |
| 40 | oIMR7339          | GTAGGTGGAAATCTAGCATCATCC                                                    | Genotyping  |
| 41 | oIMR8346          | ATACCGGAGATCATGCAAGC                                                        | Genotyping  |
| 42 | cre-only-F        | ACTGACCGTACACCAAAATTTGC                                                     | Genotyping  |
| 43 | cre-only-R        | CCGCATAACCAGTGAAACAGC                                                       | Genotyping  |
| 44 | Alb-pr2-F         | GTATATTAGAGCGAGTCTTTTC                                                      | Genotyping  |
| 45 | cre2_R            | ACCTCATCACTCGTTGCATC                                                        | Genotyping  |

Supplementary Table 2: Antibodies

| Antigen                                               | Species    | Source                           | Cat. No.   | Lot No.     | Dil. (WB) | Immunofluorescence dilution, Fixation |             |               |
|-------------------------------------------------------|------------|----------------------------------|------------|-------------|-----------|---------------------------------------|-------------|---------------|
|                                                       |            |                                  |            |             |           | Cardiomyocytes                        | Hepatocytes | HeLa          |
| Na <sup>+</sup> /K <sup>+</sup> ATPase alpha1 subunit | Mouse      | Santa Cruz Biotechnology, inc.   | SC-21712   | G3004       | 1:1000    |                                       |             |               |
| GAPDH                                                 | Mouse      | Biotrend Chemikalien             | 5G4        | 13/06-G4-C5 | 1:120000  |                                       |             |               |
| WRB                                                   | Rabbit     | Synaptic systems                 | 324 002    |             | 1:500     |                                       |             |               |
| CAML (Mouse cells)                                    | Guinea pig | Synaptic systems                 | 359 004    |             | 1:500     |                                       |             |               |
| TRC40 (Asna1)                                         | Rabbit     | Proteintech                      | 15450-1-AP |             | 1:1000    |                                       |             |               |
| Stx5                                                  | Rabbit     | Synaptic systems                 | 110053     | 110053/13   | 1:2000    | 1:200, PFA                            | 1:100, MeOH | 1:300, FA-Suc |
| Stx6                                                  | Rabbit     | Synaptic systems                 | 110062     |             | 1:1000    | 1:200, PFA                            |             |               |
| Stx8                                                  | Rabbit     | Synaptic systems                 | 110083     | 110083/9    | 1:1000    | 1:200, PFA                            | 1:300, MeOH | 1:300, FA-Suc |
| Emerin                                                | Rabbit     | Santa Cruz Biotechnology, inc.   | sc-15378   | D2412       | 1:1000    | 1:150, MeOH                           |             |               |
| Sec61 $\beta$                                         | Rabbit     | Bernhard Dobberstein, Heidelberg |            |             | 1:500     | 1:300, MeOH                           |             |               |
| LBR                                                   | Rabbit     | Proteintech                      | 12398-1-AP |             | 1:1000    | 1:500, PFA                            |             |               |
| STT3B                                                 | Rabbit     | Stephen High, Manchester         |            |             | 1:1000    |                                       |             |               |
| GM130                                                 | Mouse      | BD Transduction Laboratories     | 610823     | 24277       |           |                                       | 1:200, MeOH | 1:300, FA-Suc |
| p115                                                  | Mouse      | BD Transduction Laboratories     | 612260     |             |           | 1:400, PFA                            |             |               |
| Opsin                                                 | Mouse      | Bernhard Dobberstein, Heidelberg |            |             | 1:1000    |                                       |             |               |
| Poly-ubiquitin conjugate                              | Mouse      | ENZO                             | BML-PW8810 | 5021240     | 1:1000    |                                       |             |               |
| LC3B                                                  | Rabbit     | Cell Signaling                   | 3868       | 0009        | 1:1000    |                                       |             |               |
| GFP                                                   | Mouse      | Santa Cruz Biotechnology, inc.   | sc-9996    | F0713       | 1:1000    |                                       |             |               |
| FAM134B                                               | Rabbit     | Ivan Dikic, Frankfurt            |            |             | 1:1000    |                                       |             |               |
| p62/SQSTM1                                            | Mouse      | abcam                            | ab56416    | GR282602-1  | 1:5000    |                                       |             |               |
| Sed5                                                  | Rabbit     | Hans Dieter Schmidt, Göttingen   |            |             | 1:5000    |                                       |             |               |
| Vma2                                                  | Mouse      | Molecular probes                 | A-6427     |             | 1:1000    |                                       |             |               |

## Supplementary Figure Legends

**Supplementary Figure 1** Quantitative analysis of TA protein mRNAs. mRNA levels of investigated TRC40-pathway substrates relative to GAPDH cardiomyocytes and hepatocytes were determined by qPCR. Bars represent average  $\pm$  s.e.m. Variations are not significant by the student's t test.

**Supplementary Figure 2** Control experiments addressing putative effects of tamoxifen-induced MerCreMer translocation to the nucleus in a WRB non-floxed ( $Wrb^{wt/wt}$ ) Cre+ control mouse line. (a) TRC40-pathway components of ventricular cardiomyocytes isolated from 8-week old MerCreMer-positive, tamoxifen-induced control animals were analyzed by Western blot using GAPDH as loading control. An asterisk marks a cross-reactive protein. (b) Quantification of blots as in a. Bars represent average  $\pm$  s.e.m. (n=5, \*p-value<0.05). (c) TA proteins of ventricular cardiomyocytes isolated from the MerCreMer-positive control animals were analysed by western blot using GAPDH as loading control. (d) Quantification of blots as in c; bars represent average  $\pm$  s.e.m. (n=5). (e) Cardiomyocytes were subjected to indirect immunofluorescence staining of TA proteins and confocal images were acquired. LBR, a multi-spanning membrane protein, served as a negative control. Scale bar: 20  $\mu$ m.

**Supplementary Figure 3** Colocalization of SNARE proteins with a Golgi marker. Cardiomyocytes isolated from  $WRB^{fl/fl}$ , Cre- and  $WRB^{fl/fl}$ , Cre+ littermates were subjected to indirect immunofluorescence for Stx5, Stx6 and Stx8 in combination with the Golgi marker protein p115. Images were acquired using a confocal microscope. Scale bar: 20  $\mu$ m.

**Supplementary Figure 4** Characterization of the consequences of WRB knockout in the liver. (a) Paraffin sections of liver were subjected to Goldner or HE staining. Representative images of a  $WRB^{fl/fl}$ , Cre- and a  $WRB^{fl/fl}$ , Cre+ 8-week old animal are shown. Original magnifications: images with Goldner staining 400x, images with HE staining 200x. Goldner staining was used to

reveal connective tissue. Nuclei appear in dark purple, cytosol in pink, and collagen in light blue. Hematoxylin and Eosin (HE) staining was used to assess general morphology. Nuclei are stained in dark purple, cytosol is stained in pink, and erythrocytes appear red. (b) Blood values of the liver enzymes Aspartate Transaminase (AST) and Alanine Transaminase (ALT) were measured in WRB<sup>fl/fl</sup> Cre- and Cre+ six-week old littermates. Graphs show average  $\pm$  s.e.m. (n=9 (Cre-), n=7 (Cre+) \*\*\*p-value<0.001). (c) Cholesterol and triglyceride concentration in plasma of WRB<sup>fl/fl</sup> Cre- and Cre+ six-week old littermates. Graphs show average  $\pm$  s.e.m. (n=4, the variations are not significant by student's t test). (d) Western blots assessing the correlation between residual WRB mRNA levels and the steady-state protein levels of different TRC40 pathway components in hepatocytes isolated from six-week old animals. Blots of Cre+ littermates of the 25<sup>th</sup> (++) and 50<sup>th</sup> (+) percentile of the boxplot in Fig. 2b, together with two Cre- animals are shown. Protein amounts were quantified relative to GAPDH and shown as a bar diagram for each individual blot. An asterisk marks a cross-reactive protein. (e) Western blots assessing the correlation between residual WRB mRNA levels and the steady-state protein levels of the TA proteins Stx5 and Stx8 in hepatocytes isolated from six-week old animals. The same samples as in c were used and analysis was performed as described for c.

**Supplementary Figure 5** Steady-state protein levels and localization of TA proteins in *get* mutants lacking either the GET receptor, Get3, or both. (a) Live-cell microscopy images showing localization of selected genomically N-terminally GFP-tagged TA proteins in *S. cerevisiae* *get1/get2*, *get3*, and *get1/get2/get3* mutant strains. (b) Yeast strains depicted in panel (a) were analyzed by flow cytometry and fluorescence intensity distribution in wild type and *get* mutant strains are shown. BY4741 strain (gray trace) not expressing GFP was used as a negative control. (c) List of *S. cerevisiae* homologs of predicted human TA proteins indicating the localization of their genomically N-terminally GFP-tagged versions in wt and *get1/get2*, *get3*, and *get1/get2/get3* yeast strains based on live-cell microscopy. (d) Protein levels of native Sed5 were tested by western blot in wt, *get1/get2*, *get3*, and *get1/get2/get3* yeast

strains. The protein Vma2 was used as a loading control. (e) Quantification of blots from c. Bars represent average  $\pm$  s.e.m. (n=3, \*\*p-value<0.01).

**Supplementary Figure 6** Comparison of Stx5 and Stx8 reveals different requirements for their cellular degradation. (a) Control siRNA treated HeLa cells or siRNA-mediated knockdown cells for WRB or TRC40 were incubated for 4 hours with 10  $\mu$ M oprozomib (OPZ), an inhibitor of the proteasome, or DMSO as control. Cellular lysates were analyzed by Western blot for the indicated proteins. Graph in (b) shows quantification of the steady-state levels of Stx5 and Stx8 relative to the Na/K-ATPase. Bars represent average  $\pm$  s.e.m. (n=3) (c) Recombinant MBP-Stx5cyt and MBP-Stx8cyt were incubated at the indicated temperature. Soluble and insoluble proteins were separated by centrifugation. Fractions were loaded onto an SDS-PAGE gel and visualized by Coomassie staining. (d) Control silenced HeLa cells or knockdown cells for WRB or TRC40 were treated for 6 hours in the presence or absence of 100  $\mu$ M chloroquine (CQ). Cellular lysates were analyzed by western blot for the indicated proteins. Graphs in (e-g) show quantification of the steady-state levels of TRC40, Stx5, and Stx8. Bars represent average  $\pm$  s.e.m. (n=6, \*p-value<0.05, \*\*p-value<0.01).



# Supplementary Figure 1

## Cardiomyocytes

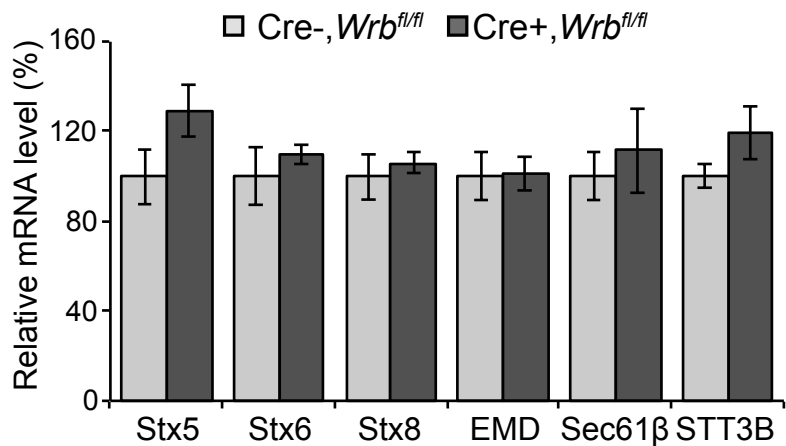

## Hepatocytes

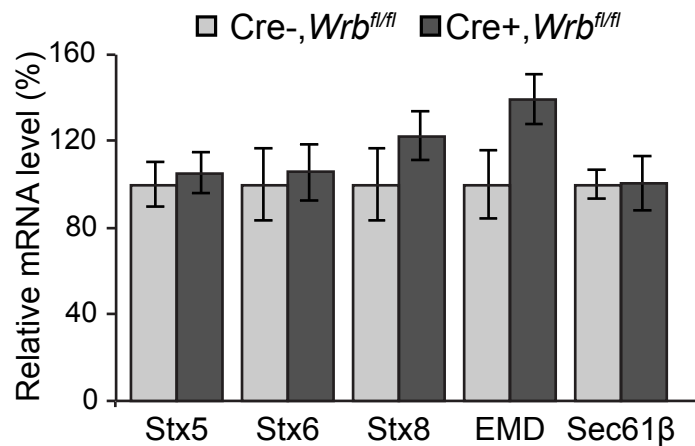

# Supplementary Figure 2

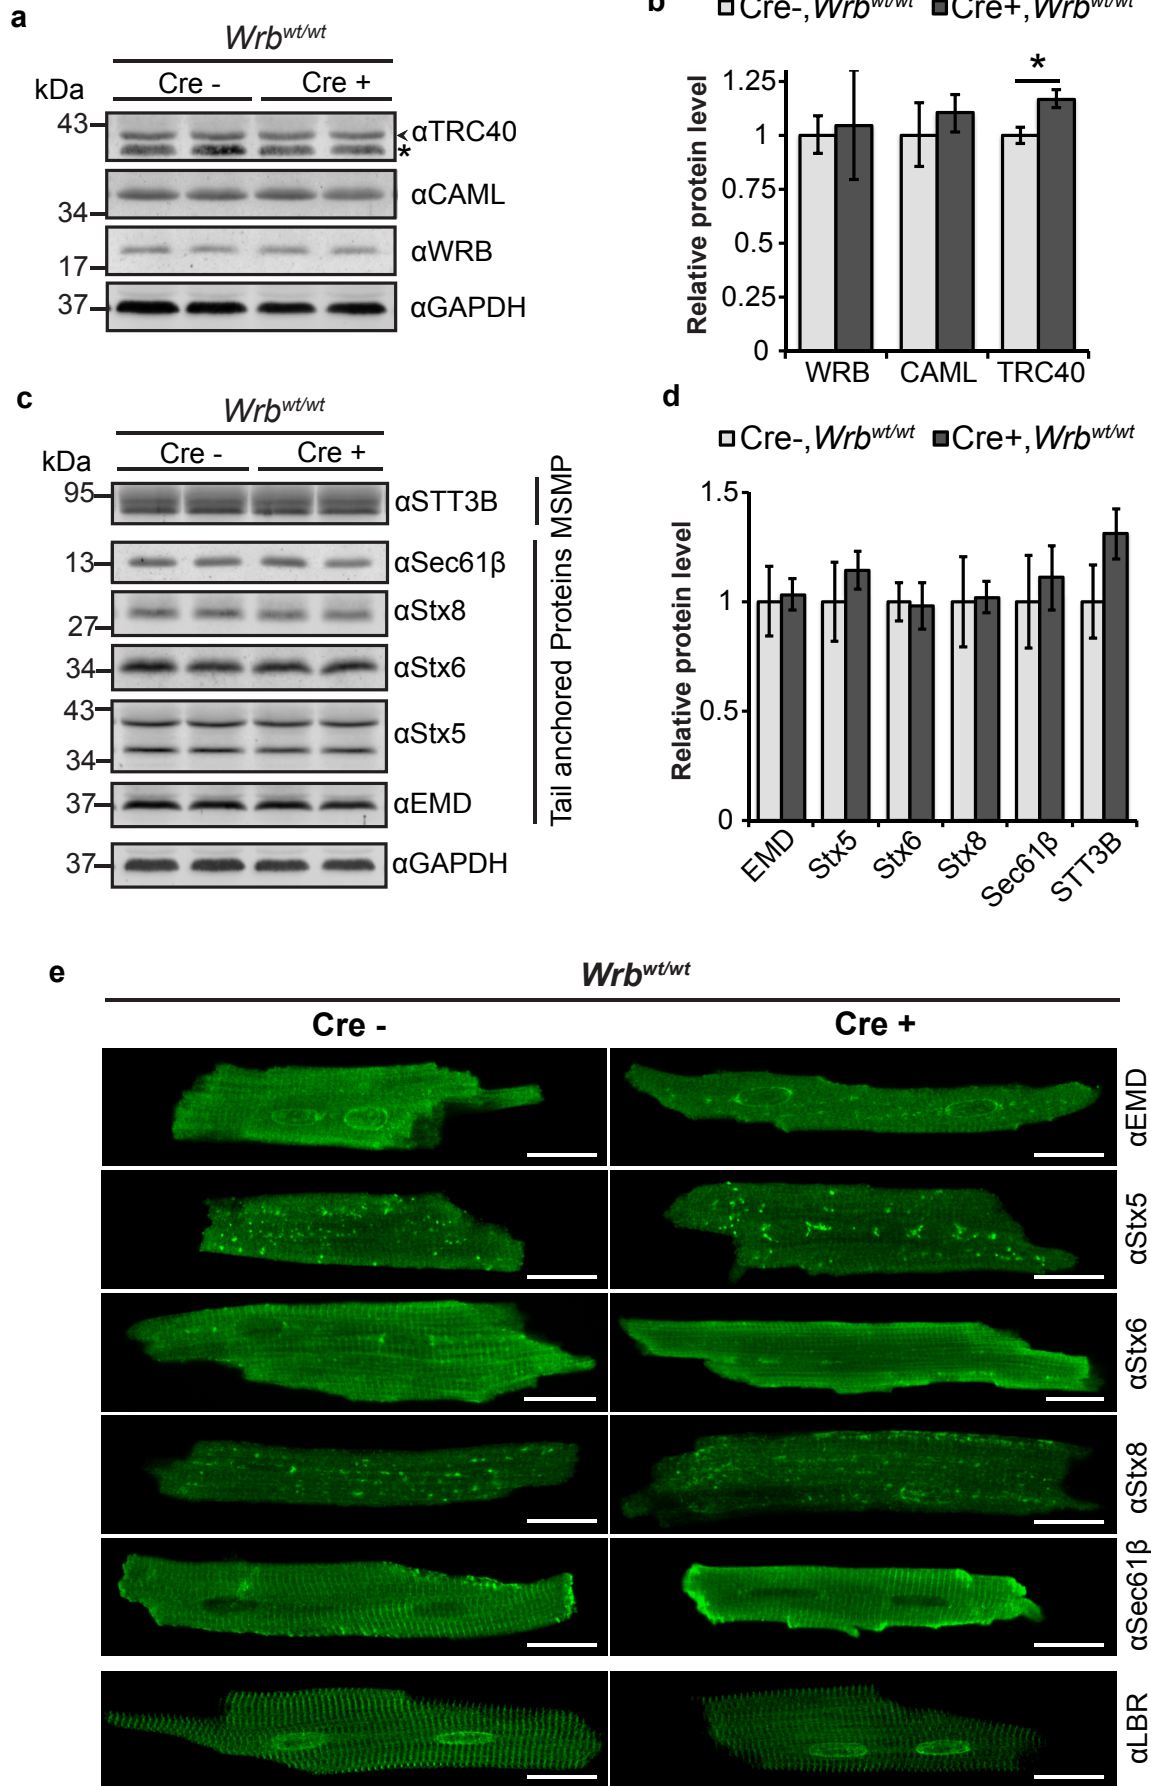

# Supplementary Figure 3

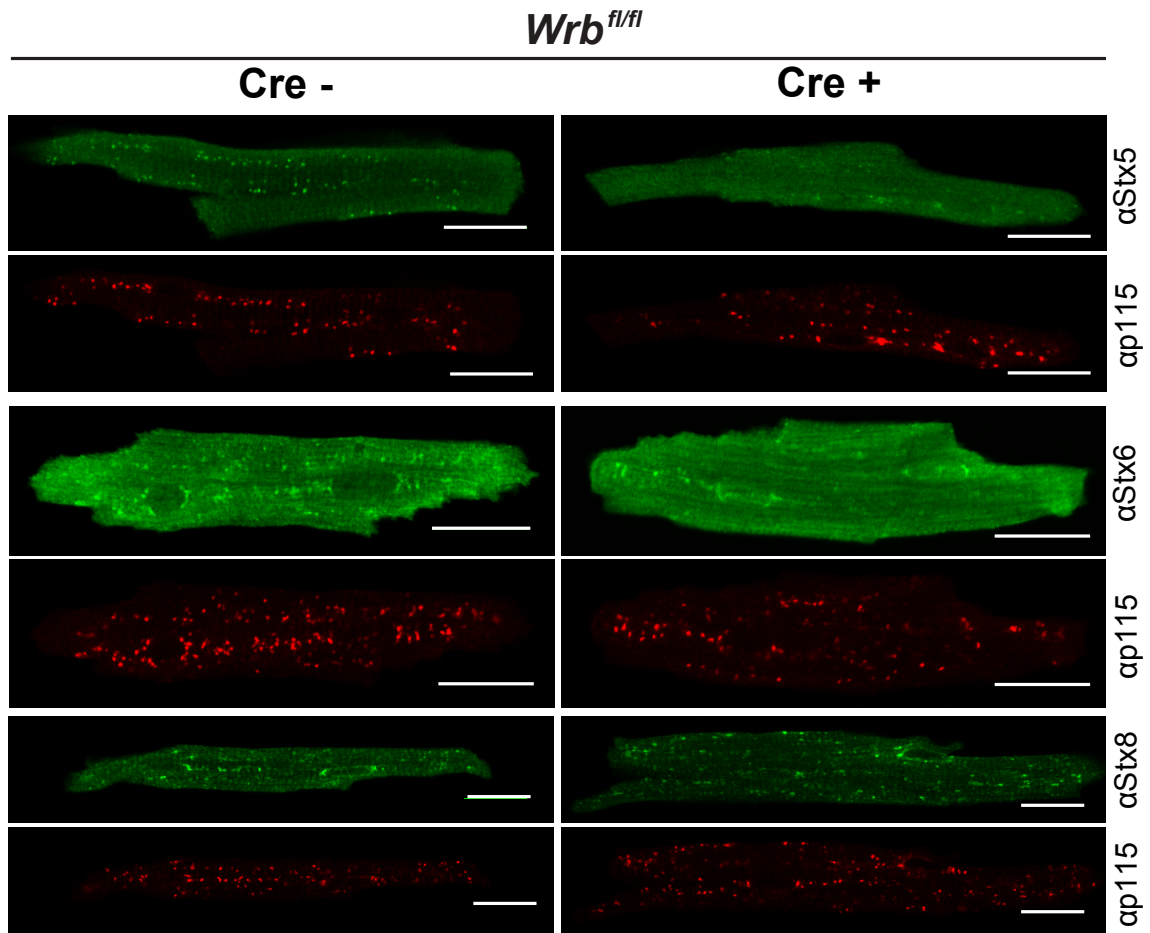

# Supplementary Figure 4

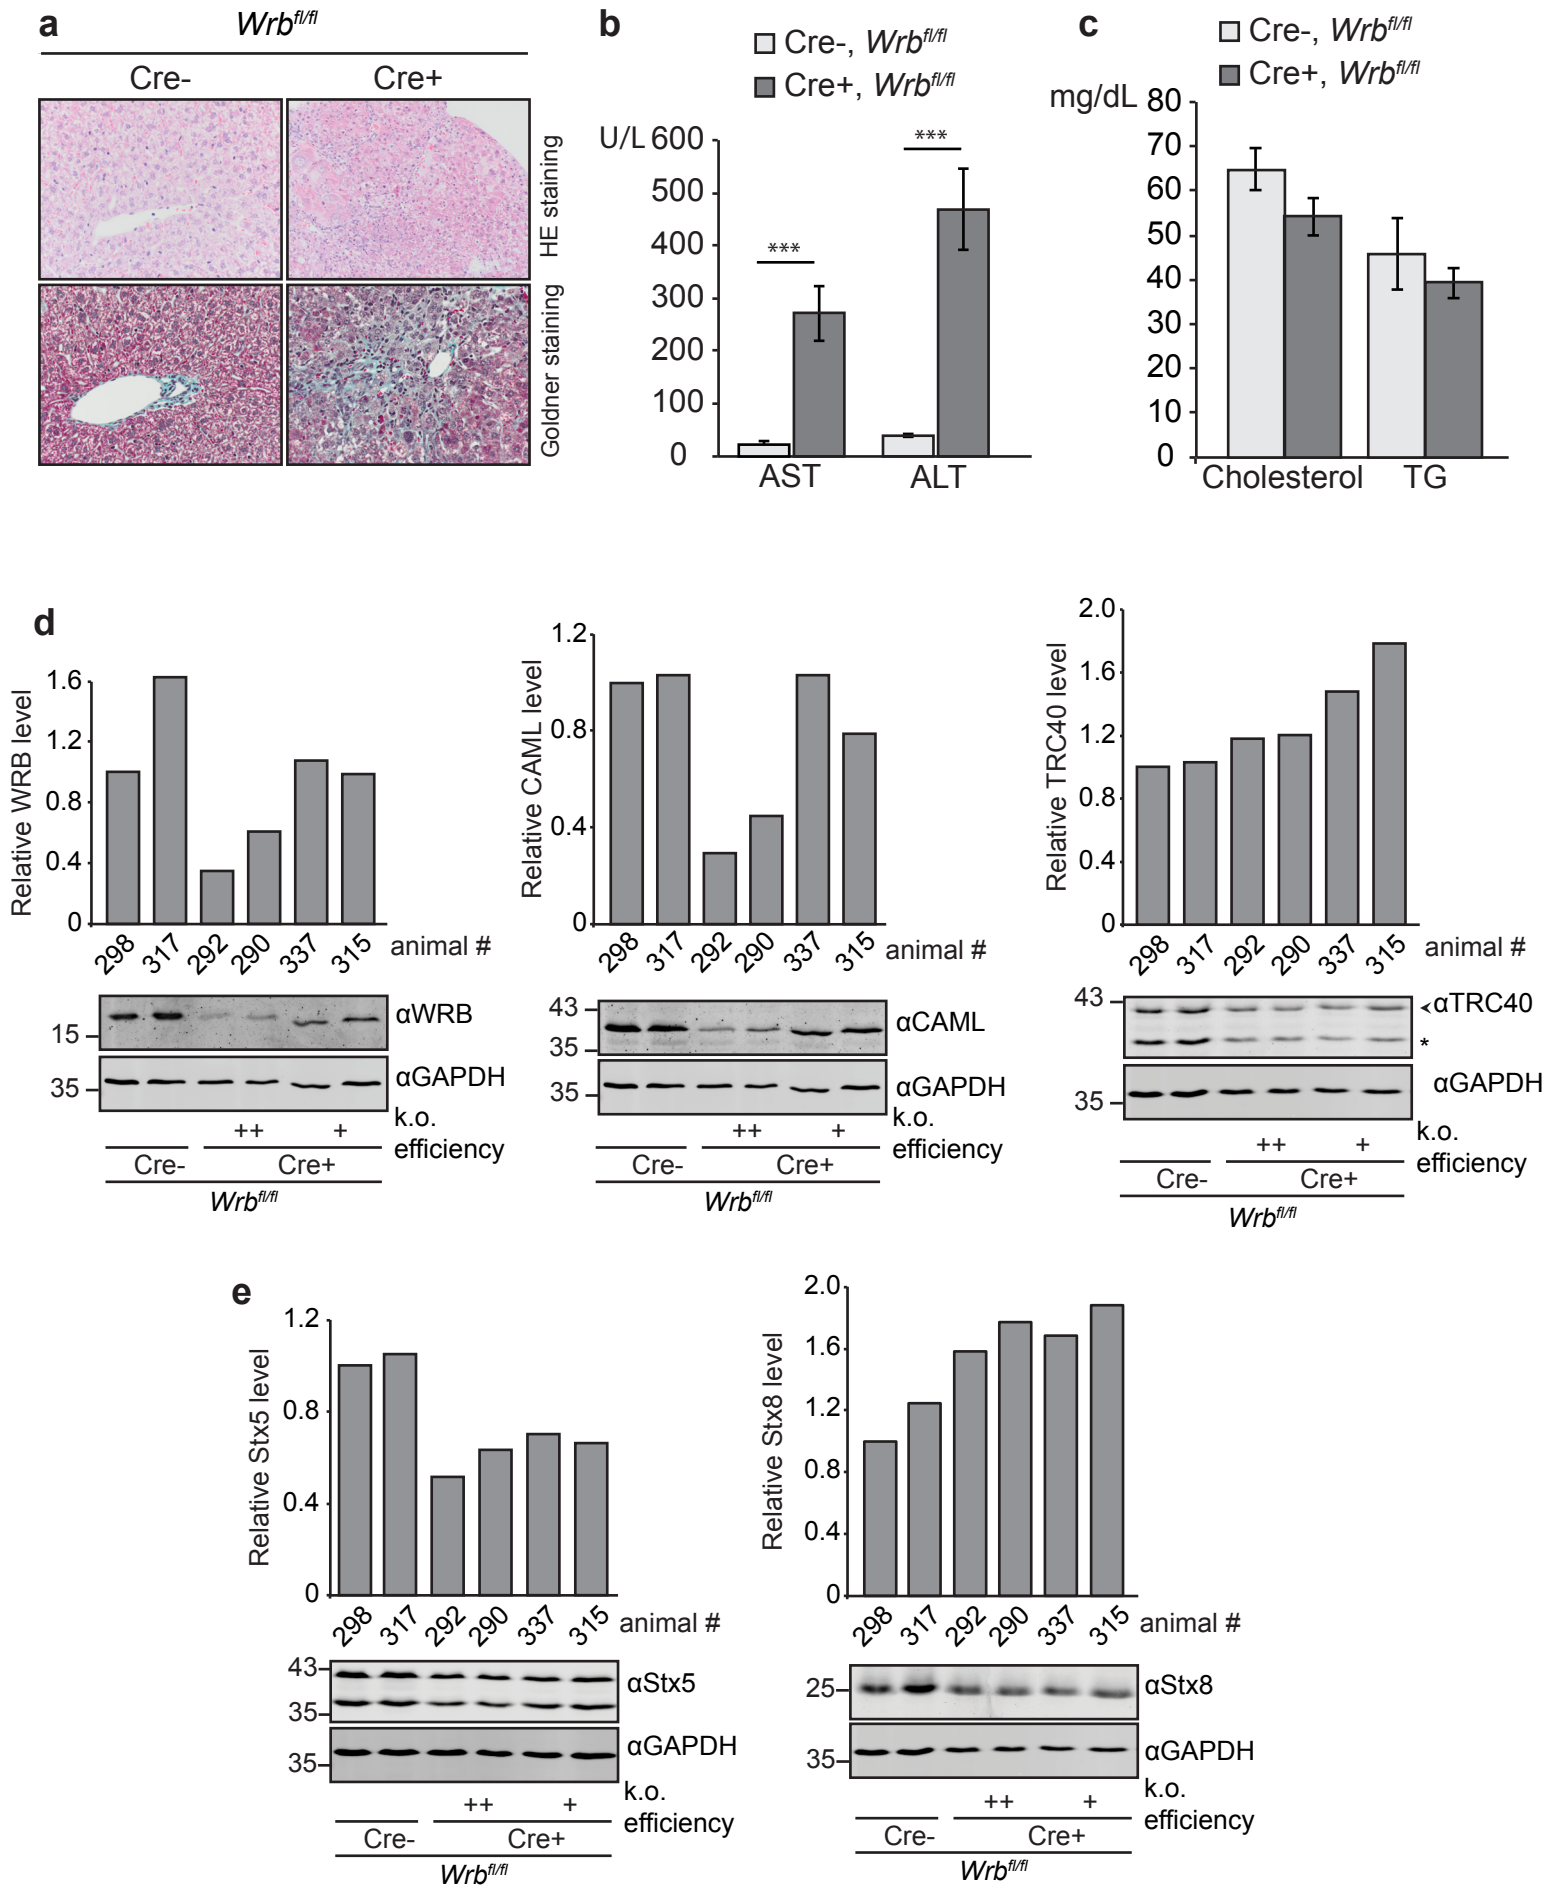

# Supplementary Figure 5

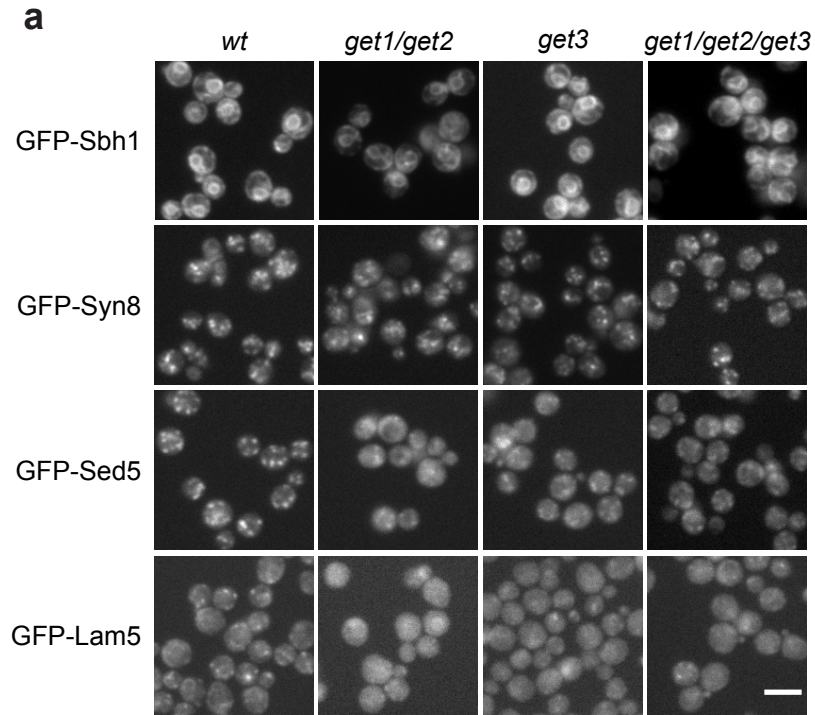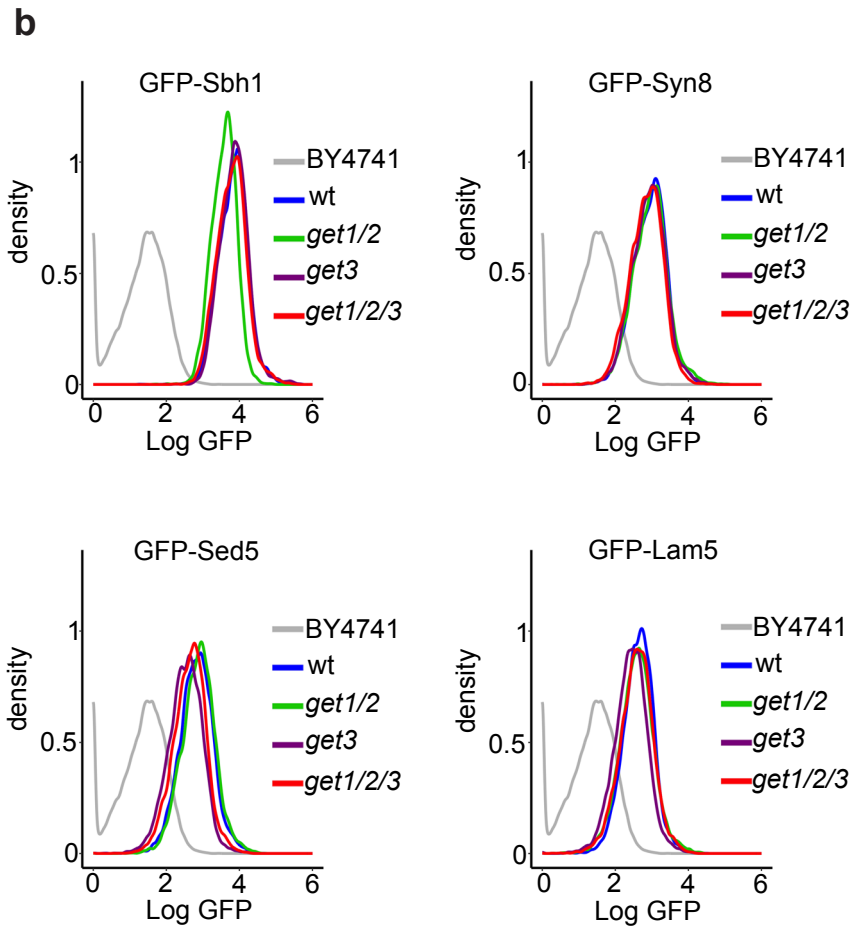

**c**

| Gene      | Localization in SWAT library | Change in localization in <i>get1/get2</i> , <i>get3</i> , <i>get1/get2/get3</i> strains |
|-----------|------------------------------|------------------------------------------------------------------------------------------|
| LAM5      | punctate, ER                 | partial loss of puncta and ER staining                                                   |
| FMP32     | faint                        | mitochondria                                                                             |
| SED5      | punctate                     | partial loss of puncta                                                                   |
| BET1      | punctate                     | no visible change                                                                        |
| BOS1      | punctate                     | no visible change                                                                        |
| CYB5      | ER                           | no visible change                                                                        |
| FIS1      | mitochondria                 | no visible change                                                                        |
| GEM1      | mitochondria                 | no visible change                                                                        |
| GOS1      | punctate                     | no visible change                                                                        |
| HFD1      | ER                           | no visible change                                                                        |
| LAM6      | punctate                     | no visible change                                                                        |
| NYV1      | vacuole                      | no visible change                                                                        |
| PEP12     | punctate                     | no visible change                                                                        |
| SBH1      | ER                           | no visible change                                                                        |
| SCS2      | ER                           | no visible change                                                                        |
| SCS22     | cytosol                      | no visible change                                                                        |
| SEC20     | ER                           | no visible change                                                                        |
| SEC22     | ER                           | no visible change                                                                        |
| SFT1      | cytosol                      | no visible change                                                                        |
| SNC1      | punctate, cytosol            | no visible change                                                                        |
| SNC2      | punctate                     | no visible change                                                                        |
| SSO1      | vacuole                      | no visible change                                                                        |
| SSO2      | cell periphery               | no visible change                                                                        |
| SSS1      | ER                           | no visible change                                                                        |
| SYN8      | punctate                     | no visible change                                                                        |
| TLG1      | punctate                     | no visible change                                                                        |
| TLG2      | punctate                     | no visible change                                                                        |
| TOM7      | mitochondria                 | no visible change                                                                        |
| UBC6      | ER                           | no visible change                                                                        |
| USE1      | ER                           | no visible change                                                                        |
| VAM3      | vacuole                      | no visible change                                                                        |
| VPS64     | ER                           | no visible change                                                                        |
| VTI1      | punctate                     | no visible change                                                                        |
| YDL012C   | bud tip, bud neck            | no visible change                                                                        |
| YDR034W-B | cell periphery               | no visible change                                                                        |
| YLR283W   | ER                           | no visible change                                                                        |
| YSY6      | ER                           | no visible change                                                                        |
| FAR10     | faint                        | no visible change                                                                        |
| UFE1      | faint                        | no visible change                                                                        |
| YSP2      | faint                        | no visible change                                                                        |
| COX16     | not in library               | not in library                                                                           |
| HMX1      | not in library               | not in library                                                                           |
| LAM4      | not in library               | not in library                                                                           |
| SBH2      | not in library               | not in library                                                                           |
| YDR210W   | not in library               | not in library                                                                           |

**d**

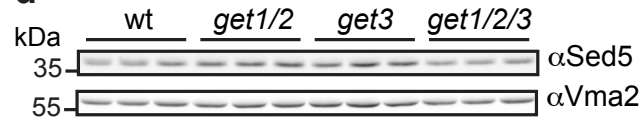

**e**

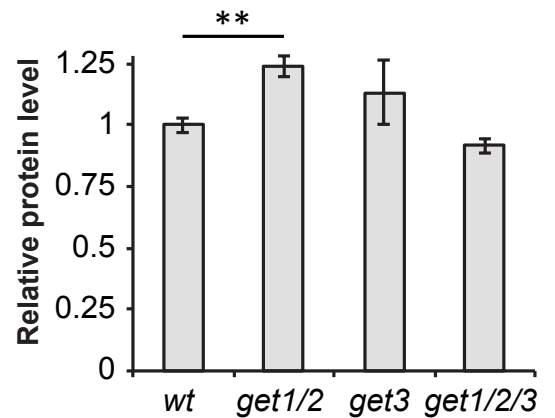

# Supplementary Figure 6

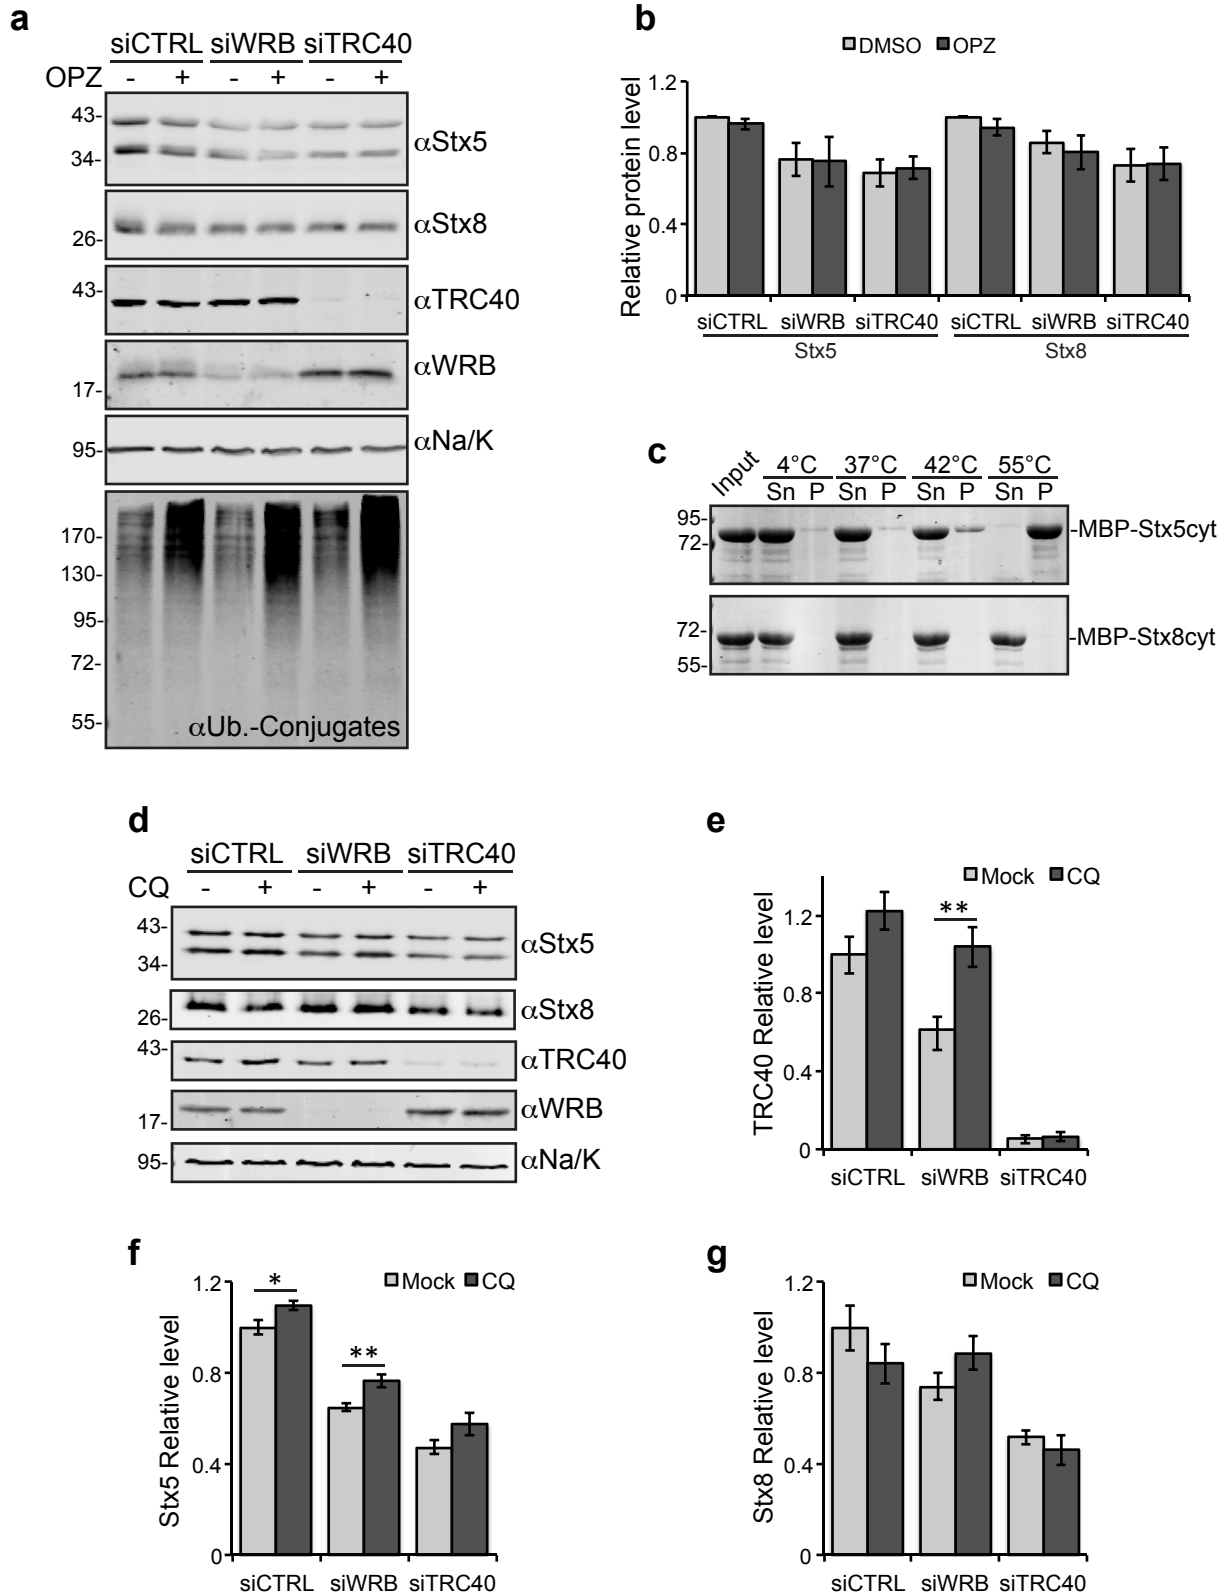

Supplement: srep39464-s1.pdf [file srep39464-s1.pdf]
